# Supplementary material for: Lactate-induced M2 polarization of tumor-associated macrophages promotes the invasion of pituitary adenoma by secreting CCL17
Source: Theranostics. 2021 Feb 6;11(8):3839–52. doi: 10.7150/thno.53749 (PMC7914368; doi:10.7150/thno.53749)
Supplement: Supplementary file 1 — Supplementary figures and tables. [file thnov11p3839s1.pdf]

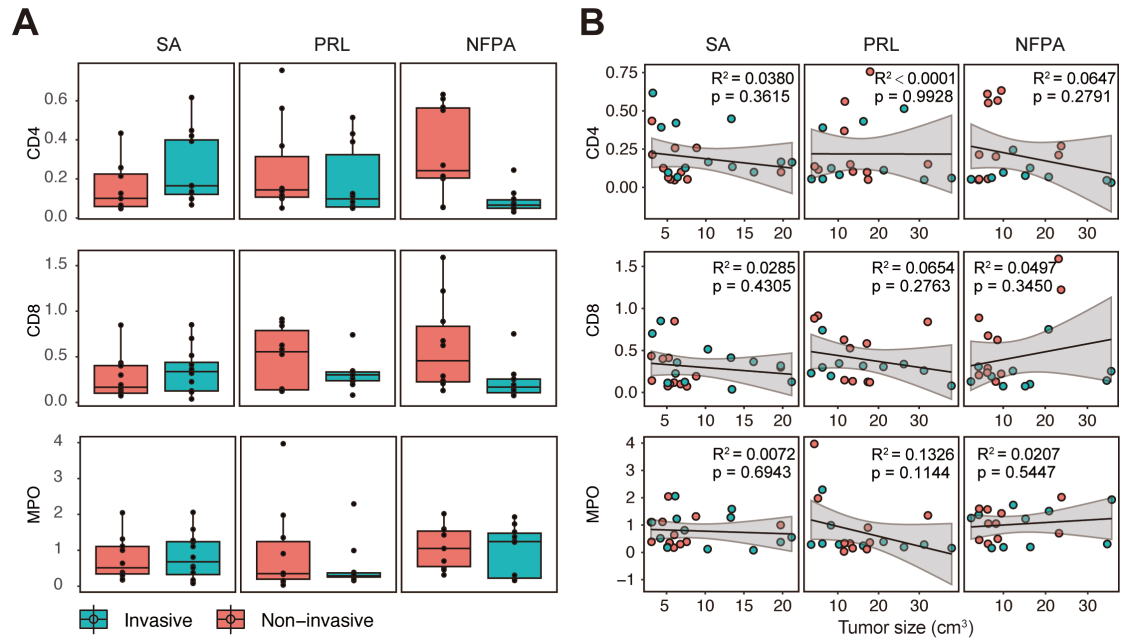

**Supplementary Figure 1. Additional correlation between tumor characteristics and immune infiltration.** **A**, Difference of CD4, CD8 or MPO levels in invasive PAs and noninvasive PAs in SA, PRL, and NFPA. **B**, Correlation of tumor size and relative expression of CD4, CD8 or MPO in SAs, PRLs, and NFPA. Each dot represents the value of a patient. Mean  $\pm$  SEM.

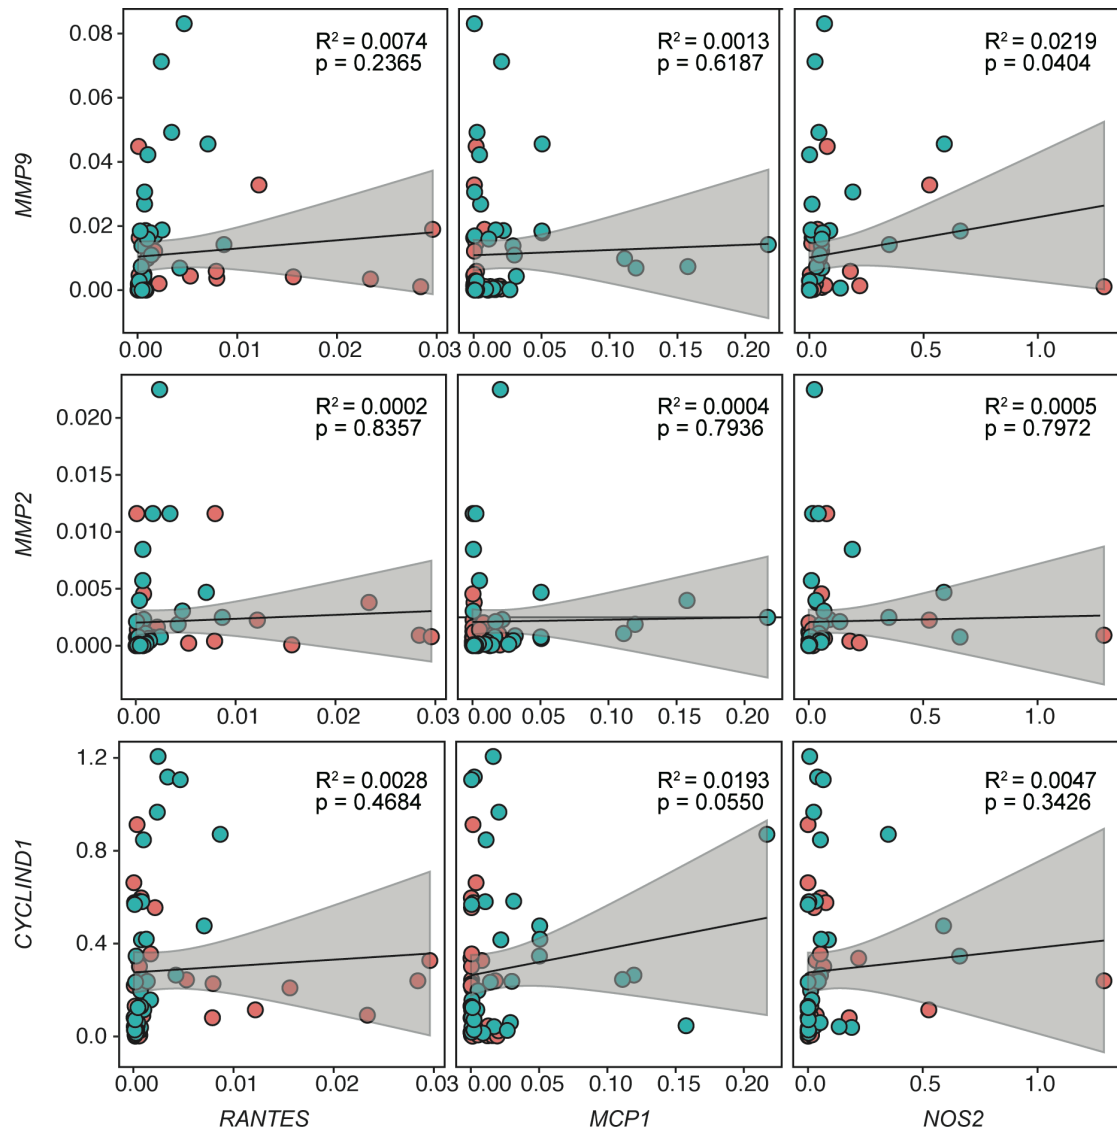

**Supplementary Figure 2. Correlation between tumor invasion -related genes and M1 macrophage biomarkers.** Correlation of M1 macrophage biomarkers and *MMP2*, *MMP9*, and *CYCLIND1* in tumor samples from PA patients. Each dot represents the value of a patient.

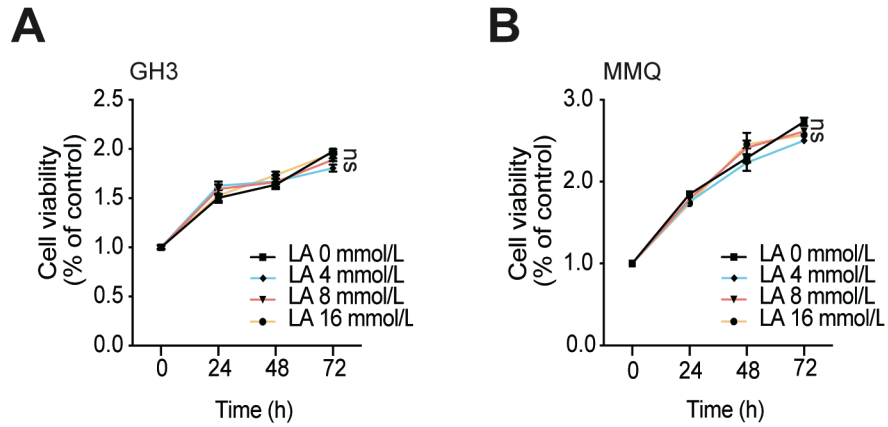

**Supplementary Figure 3. Lactate did not directly enhanced PA cell proliferation.**

**A and B**, Cell proliferation assay of (A) GH3 and (B) MMQ cells in the present or absent of increasing concentration of lactic acid for 24, 48, and 72 h. NS, no significance.

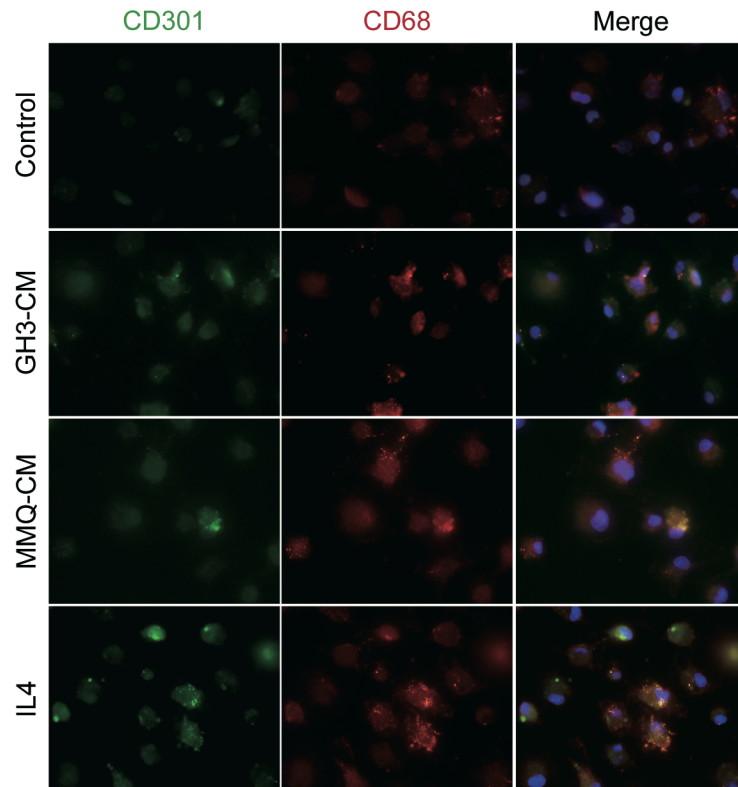

17

18 **Supplementary Figure 4. immunofluorescence images of BMDMs.** Representative  
 19 immunofluorescence images of BMDM co-stained with CD301 (green) and CD68  
 20 (red) following stimulation with the PBS, CM, or IL4 (10 ng/ml) for 24 h. Cell nuclei  
 21 were counterstained with DAPI.

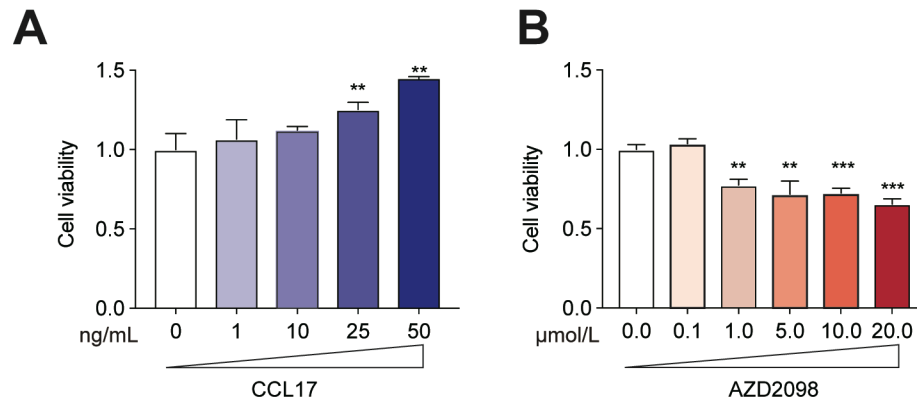

**Supplementary Figure 5. Selection of stimulus concentration gradient. A and B,**

Cell viability of GH3 treated with the indicated concentration of (A) rCCL17 or (B)

AZD2098 for 24 h. Statistical significance was determined using *one-way ANOVA*.

\*P < 0.05, \*\*P < 0.01, and \*\*\*P < 0.001.

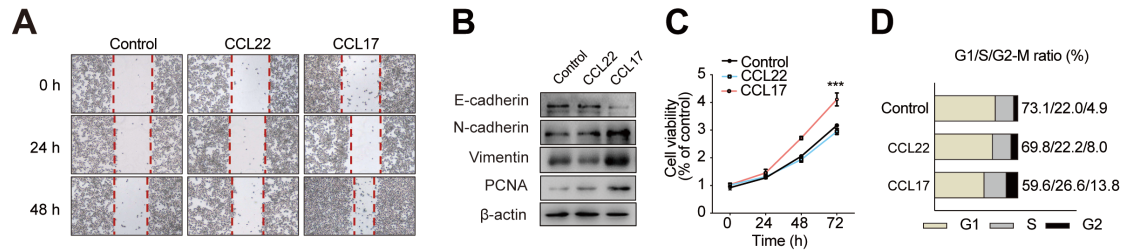

**Supplementary Figure 6. CCL17 promoted cell proliferation and invasion of PA**

**cells. A,** Representative images of wound scratching assay of GH3 cells following

treatment of PBS, rCCL22, or rCCL17 for 24 and 48 h. **B,** PCNA and EMT

biomarkers protein expression in GH3 cells under stimulation of PBS, rCCL22, or

rCCL17 down-regulated TAMs for 24 h. **C,** Proliferation of GH3 cells following

stimulation with PBS, rCCL22, or rCCL17 for 24, 48, and 72 h. **D,** Cell cycle assays

in GH3 cells in the presence or absence of rCCL22, or rCCL17 for 24 h. All t-tests

were two-tailed. Mean  $\pm$  SEM. \*\*\*P < 0.001.

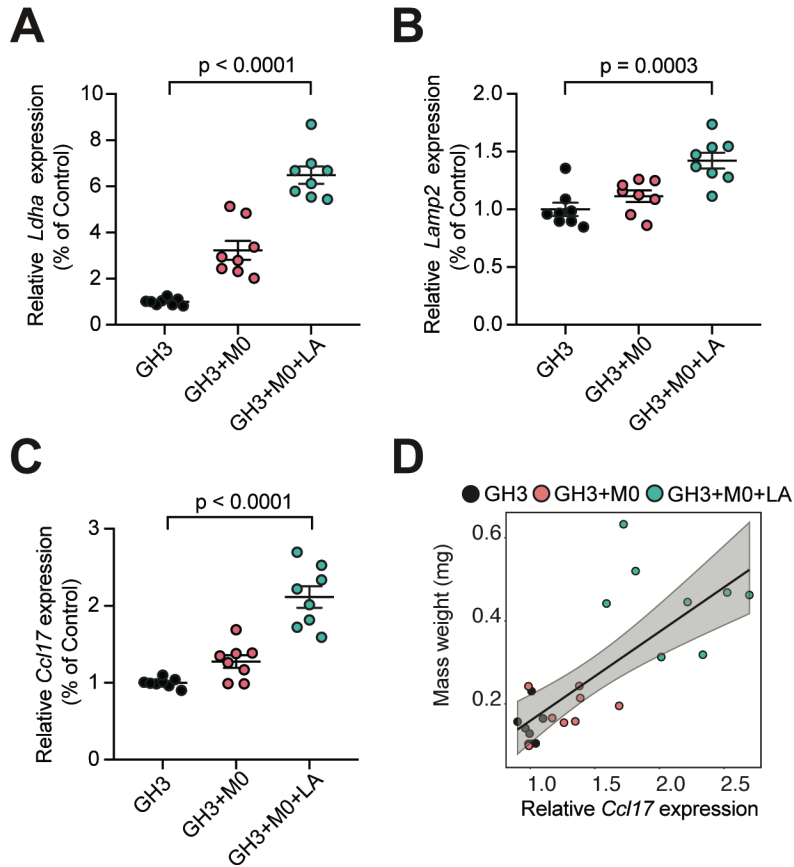

36

37 **Supplementary Figure 7. Tumor characteristics and CCL17 expression in tumor**  
 38 **bearing Nod Scid models. A-C, mRNA expression of (A) *LDHA*, (B) *LAMP2*, and**  
 39 **(C) *CCL17* in tumors from GH3, GH3+M0, and GH3+M0+LA group (n = 8). D,**  
 40 **Positive correlation between *CCL17* levels and mass weight of tumors from GH3,**  
 41 **GH3+M0, and GH3+M0+LA group (n = 8). All t-tests were two-tailed. Mean  $\pm$  SEM.**

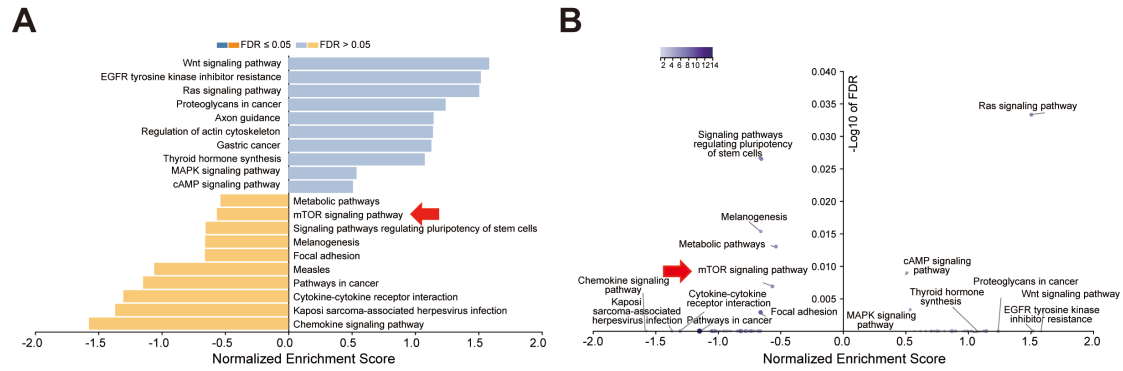

**Supplementary Figure 8. Bioinformatic analysis of invasive and non-invasive PAs RNA-seq profile. A and B, The customizable volcano plot (A) and bar chart (B) show enrichment ratio or NES of results with the direction indicated the role of mTOR signal pathway in the progression of pituitary adenoma.**

47 **Supplementary Table 1. PCR primers.**

| <b>Genes</b>    | <b>Primer-forward</b>     | <b>Primer-reverse</b>  |
|-----------------|---------------------------|------------------------|
| <b>Human</b>    |                           |                        |
| <i>CYCLIND1</i> | GCCGAGAAGCTGTGCATCTA      | GAAATCGTGCGGGGTCATTG   |
| <i>MMP9</i>     | GTACTCGACCTGTACCAGCG      | AGAAGCCCCACTTCTTGTCG   |
| <i>MMP2</i>     | AACCAGCTGGCCTAGTGATG      | CTTGGGGCAGCCATAGAAGG   |
| <i>CD206</i>    | GCAGAAGGAGTAACCCACCC      | ATTTGGGTTCGGGAGTCGTC   |
| <i>CD301</i>    | GCCAGGTGGCTACTCTCAAC      | TAGCAGCTGTCTTGGTGCTC   |
| <i>ARG1</i>     | ACTTAAAGAACAAGAGTGTGATGTG | ATTGCCAAACTGTGGTCTCC   |
| <i>RANTES</i>   | ATGACTCCCGGCTGAACAAG      | CACACTTGGCGGTTCTTTTCG  |
| <i>MCP1</i>     | AGAGGCTGAGACTAACCCAGA     | TTTCATGCTGGAGGCGAGAG   |
| <i>NOS2</i>     | CGCATGACCTTGGTGTTTGG      | CATAGACCTTGGGCTTGCCA   |
| <i>CCL17</i>    | GGACGAAGAAGAGCCACAGT      | GCTCCAGTTCAGACAAGGGG   |
| <i>LDHA</i>     | AGCTGTTCCACTTAAGGCCC      | AATGAGATCCGGAATCGGCG   |
| <i>LAMP2</i>    | CGCCGATTCTTGGCTTTTG       | AAGAGCACTGATGACCACCG   |
| <i>ACTB</i>     | CTCACCATGGATGATGATATCGC   | CCACATAGGAATCCTTCTGACC |
| <b>Rat</b>      |                           |                        |
| <i>Cd301</i>    | AGATGAAGCTGGCCAAGGAC      | GAGGAGTCCAAACTCCAGGC   |
| <i>Arg1</i>     | GGACATCGTGTACATCGGCT      | CTTCCTTCCCAGCAGGTAGC   |
| <i>Mcp1</i>     | TAGCATCCACGTGCTGTCTC      | TTCTCCAGCCGACTCATTGG   |
| <i>Nos2</i>     | ACACAGTGTCGCTGGTTTGA      | ACCAACTCTGCTGTTCTCCG   |
| <i>Ccl17</i>    | GCCTGGACTACTTCAAGGGG      | CACTGAGGTCCTGAACCACG   |
| <i>Ldha</i>     | TAGCACTTCACTGTCCAGGC      | AACACAACCTGGACCAACTGGA |
| <i>Lamp2</i>    | AGCCCTGGGAGGAGTACTTA      | TGATGGCGCTTGAGACCAAT   |
| <i>Actb</i>     | GCAGGAGTACGATGAGTCCG      | ACGCAGCTCAGTAACAGTCC   |

48

49
